# Supplementary material
Source: Springer Nature journal article supplement (https://www.springermedizin.de/resource/supplementary/12937_2003_11_MOESM1_ESM.pdf/25654244)
Supplement: MOESM1 [file 25654244]

**D-glucose**

**D-galactose**

Glucose-6-phosphate

Uridine diphosphate  
glucose

Uridine diphosphate  
glucuronic acid

D-glucuronic acid

D-glucoronolactone

pentose  
phosphate  
pathway

L-gulono- $\gamma$ -lactone

L-gulonolactone  
oxidase

2-keto-gulono- $\gamma$ -lactone

**L-ascorbic acid**
